# Supplementary material
Source: PubMed Central journal article supplement (PMC8242500)

# Supplementary Figure 1 - NYP Anticoagulation for CRRT Protocol

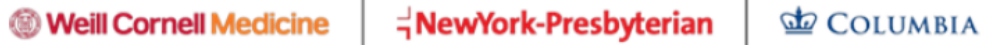

Anticoagulation Guideline During Continuous Renal Replacement Therapy (CRRT) COVID-19  
 Protocol for Recurrent Clotting Episodes in a 24-hour Period  
 Last Updated April 16, 2020

This guideline does not apply to the following patients

- Already on systemic heparin for another indication
- Heparin allergy
- Suspected of confirmed heparin-induced thrombocytopenia

**START: All patients should be on 500 units/hr of regional heparin.**

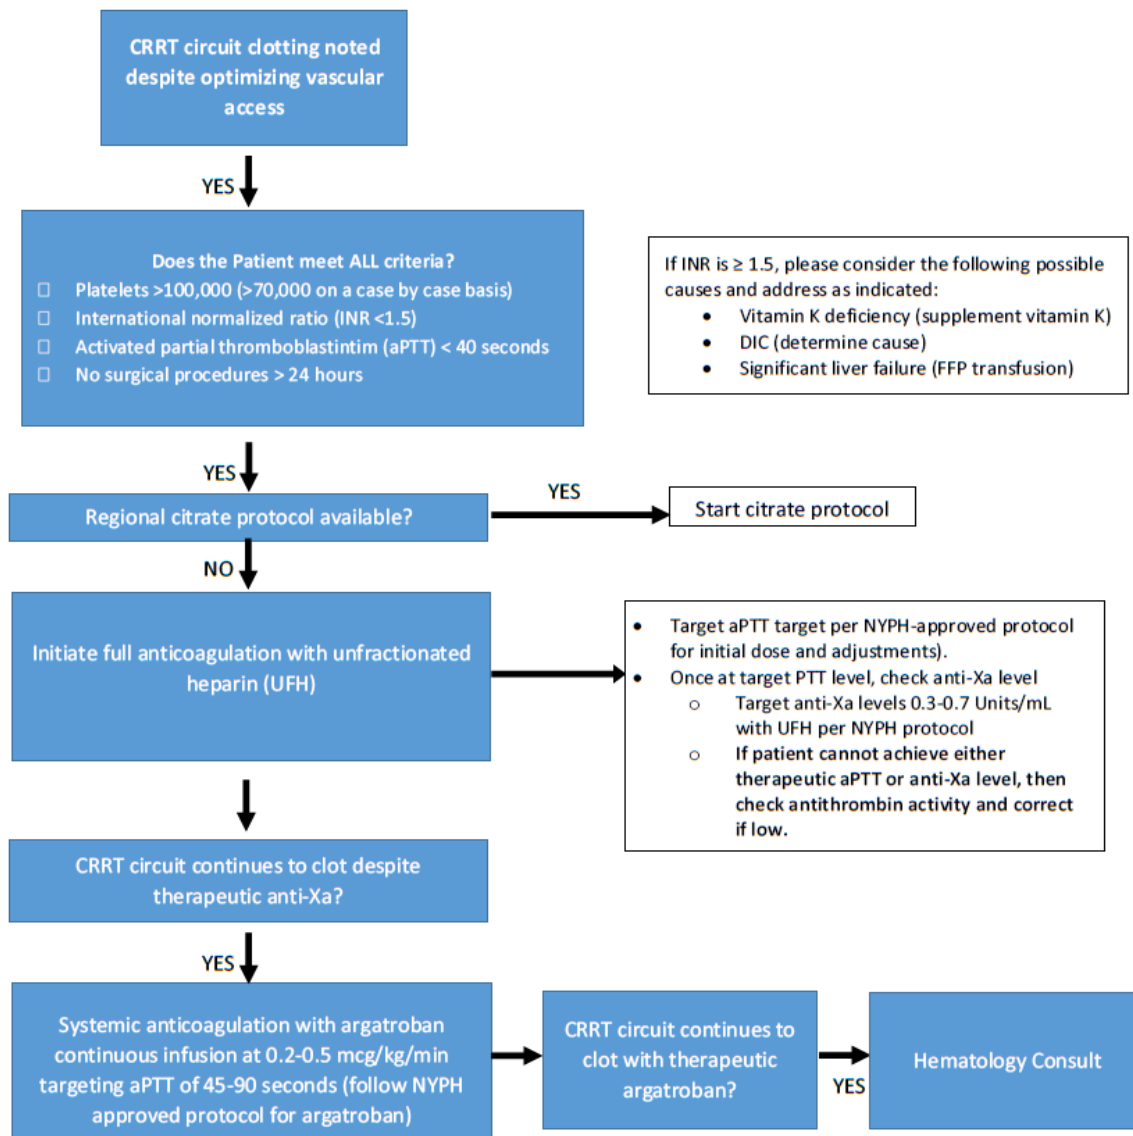

Supplement: SDI-34-561-s001.pdf [file SDI-34-561-s001.pdf]
